# Supplementary material for: A facile drop-casting approach to nanostructured copper oxide-painted conductive woven textile as binder-free electrode for improved energy storage performance in redox-additive electrolyte
Source: Royal Society of Chemistry journal article supplement (doi:10.1039/c6ta10428b), 2016-12-15
Supplement: c6ta10428b1.pdf [file c6ta10428b1.pdf]

## Supporting Information

# **A Facile Drop-Casting Approach to Nanostructured Copper Oxide Painted Conductive Woven Textile as Binder-free Electrode for Improved Energy Storage Performance in Redox-additive Electrolyte**

Sung Min Cha, Goli Nagaraju, S. Chandra Sekhar, and Jae Su Yu\*

Department of Electronics and Radio Engineering, Institute for Wearable Convergence  
Electronics, Kyung Hee University, 1 Seocheon-dong, Giheung-gu, Yongin-si, Gyeonggi-do446-  
701, Republic of Korea

\*Address correspondence to [jsyu@khu.ac.kr](mailto:jsyu@khu.ac.kr)

Tel: +82-31-201-3820; Fax: +82-31-206-2820

| Atom                | Site   | x                | y       | z    | Occ   |
|---------------------|--------|------------------|---------|------|-------|
| Copper (Cu)         | 4c     | 0.25             | 0.25    | 0.0  | 0.493 |
| Oxygen (O)          | 4e     | 0.0              | 0.08479 | 0.25 | 0.525 |
| Lattice Parameters  |        | R-Factors        |         |      |       |
| a (Å)               | 4.685  | R <sub>wp</sub>  | 7.70    |      |       |
| b (Å)               | 3.417  | R <sub>p</sub>   | 4.34    |      |       |
| c (Å)               | 5.141  | R <sub>exp</sub> | 3.10    |      |       |
| V (Å <sup>3</sup> ) | 81.187 | $\chi^2$         | 6.15    |      |       |

**Table S1.** Crystallographic and atomic parameters of the caterpillar-like CuO NSs.

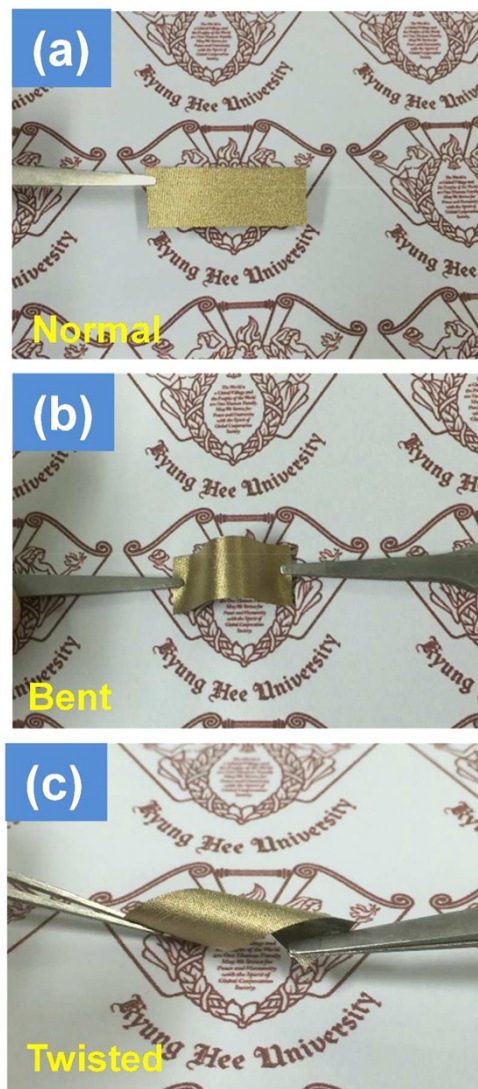

**Figure S1.** (a-c) Photographic images of the CWTs under normal, bent and twisted conditions, showing its great flexibility.

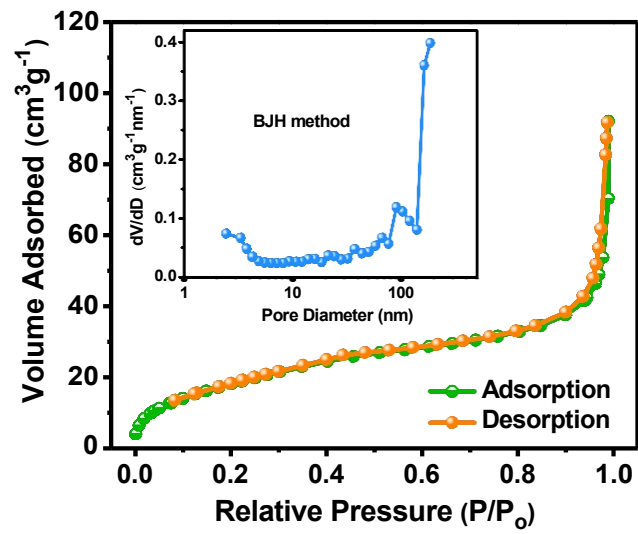

**Figure S2.**  $\text{N}_2$ -adsorption-desorption isotherms and BJH plots of the caterpillar-like CuO NSs.

**Table S2:** Comparative electrochemical performances of the caterpillar-like CuO NSs with the previously reported CuO-based nanocomposites in three electrode system.

| Active materials                   | Electrode    | Mass (mg/cm <sup>2</sup> ) | Electrolyte                                         | Current (mA/cm <sup>2</sup> ) | Areal capacitance (mF/cm <sup>2</sup> ) | Ref.     |
|------------------------------------|--------------|----------------------------|-----------------------------------------------------|-------------------------------|-----------------------------------------|----------|
| Lotus-like CuO/Cu(OH) <sub>2</sub> | Cu foil      | 0.35                       | 5 M NaOH                                            | 2                             | 97.3                                    | [1]      |
| CuO nanoflakes                     | Cu foil      | 0.23                       | 1 M KOH                                             | 2                             | 44                                      | [2]      |
| Cu(OH) <sub>2</sub> nanobelts      | Dacron cloth | --                         | 1 M NaOH                                            | 0.5                           | 217                                     | [3]      |
| CuO/rGO composite                  | Ni foam      | 1                          | 0.5 M K <sub>2</sub> SO <sub>4</sub>                | 0.5                           | 326                                     | [4]      |
| Flower-like NiO@CuO                | Ni foam      | 2                          | 6 M KOH                                             | 2                             | 560                                     | [5]      |
| Gear-like CuO                      | Cu foil      | 0.2                        | 0.1 M KOH                                           | 0.2                           | 70                                      | [6]      |
| CuO@MnO <sub>2</sub>               | Ni foam      | 0.8                        | 1 M Na <sub>2</sub> SO <sub>4</sub>                 | 1.2                           | 552                                     | [7]      |
| rGO@Cu <sub>2</sub> O composite    | Cu foil      | 2                          | 1 M KOH                                             | 2                             | 197                                     | [8]      |
| Ni@NiO inverse opal                | FTO glass    | 0.1                        | 1 M KOH                                             | 0.2                           | 11                                      | [9]      |
| Caterpillar-like CuO NSs           | CWTs         | 1                          | 1 M KOH                                             | 2                             | 271.7                                   | Our work |
| Caterpillar-like CuO NSs           | CWTs         | 1                          | 1 M KOH + 0.01 M K <sub>3</sub> Fe(CN) <sub>6</sub> | 2                             | 670.68                                  | Our work |

## Section 1

### **Fabrication of activated carbon (AC) on carbon fabric (CF):**

Commercially purchased AC (80%), PVDF (10%) and conductive carbon black (10%) was homogeneously mixed in an agate mortar for 30 min. After that required amount of N-methyl pyrrolidone was dropped into the above mixture to form slurry. The obtained slurry was uniformly coated on well-cleaned CF fibers and air dried for 2 h. After that, the AC coated on CF (negative electrode) was dried at 80 °C for 6 h to completely remove the moisture. The mass loading of the AC on CC was obtained as  $1.0 \pm 0.03 \text{ mg/cm}^2$ . The electrochemical performance of this electrode was tested in redox-additive electrolyte solution (i.e., 0.01 M  $\text{K}_3\text{Fe}(\text{CN})_6 + 1 \text{ M KOH}$ ) with a Pt wire as counter and Ag/AgCl as a reference electrode, respectively. Figure S3 (a) shows the CV curves of the AC coated CF showing the rectangular CV curve area which is a typical behavior of carbon based materials. The measured  $C_{ac}$  values from the GCD curves of Figure S3 (b) at a current density 3, 4, and 5  $\text{mA/cm}^2$  are of 339.5296.7 and 276.5  $\text{mF/cm}^2$ , respectively.

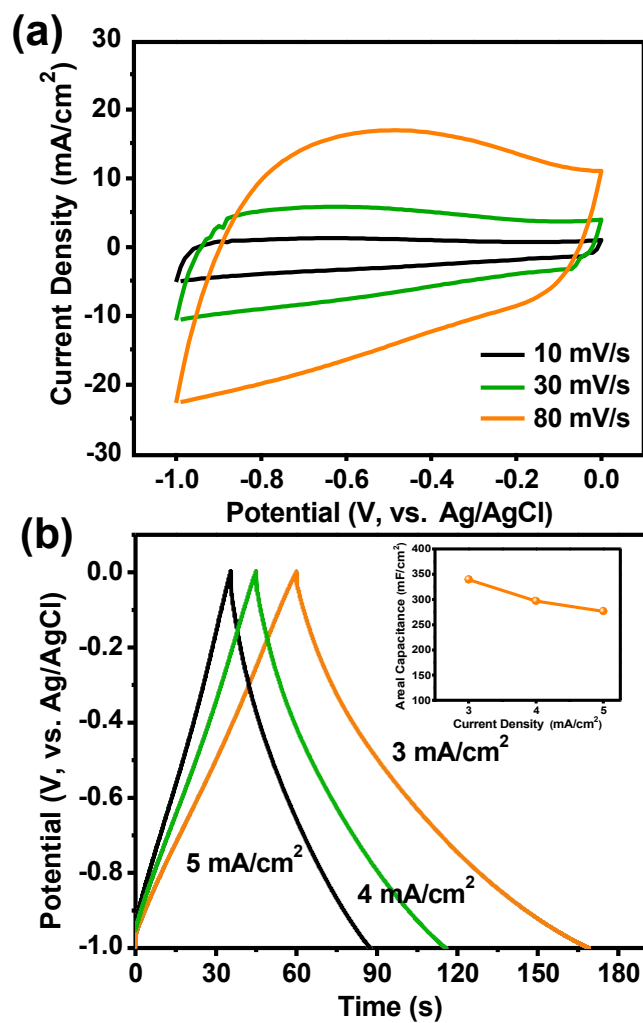

**Figure S3.** (a) CV curves and (b) GCD curves of the AC on CF at different scan rates and current densities, respectively.

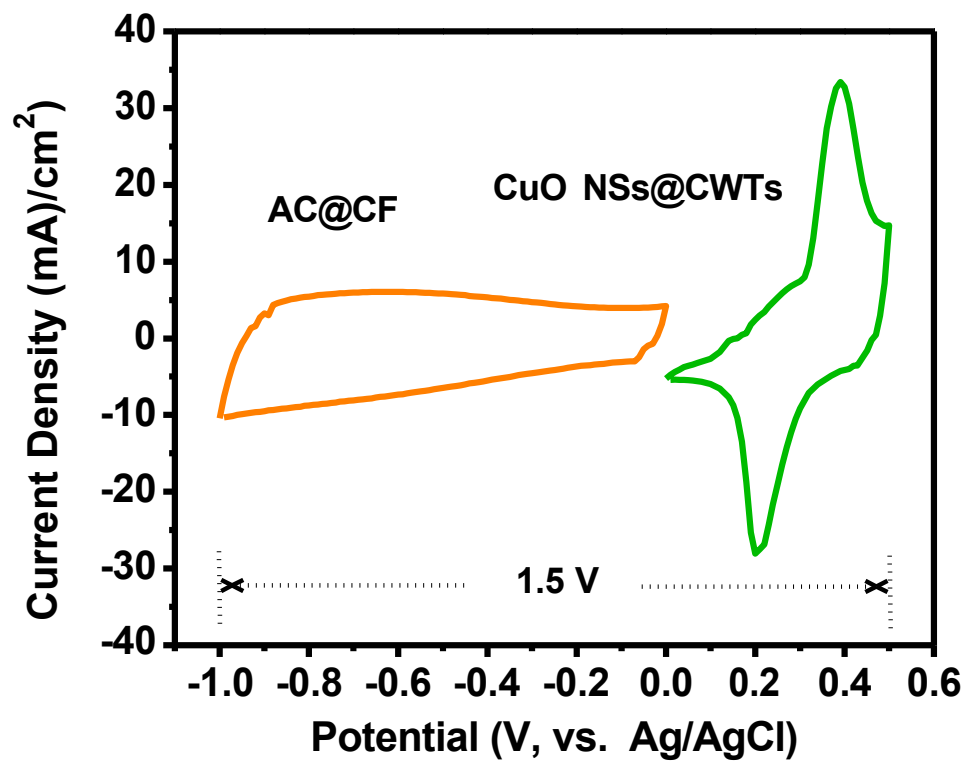

**Figure S4.** Comparative CV curves of the both negative and positive electrodes measured at scan rate of 30 mV/s in three-electrode system.



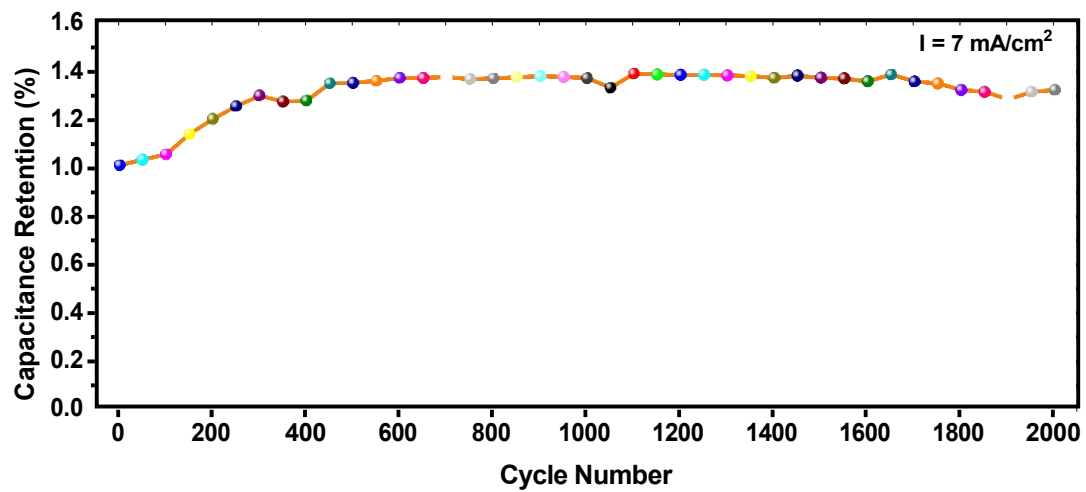

**Figure S5.** Cycling stability of the fabricated asymmetric SCs based on caterpillar-like CuO NSs on CWTs as positive electrode and AC coated CC as negative electrode, respectively.
